# Supplementary material for: Shallow- and Deep-Water Ophiura Species Produce a Panel of Chlorin Compounds with Potent Photodynamic Anticancer Activities
Source: MDPI journal article supplement (doi:10.3390/antiox12020386), 2023-02-05
Supplement: s1 [file s1]

SUPPLEMENTARY MATERIALS include Supplementary Figures S1-S36.

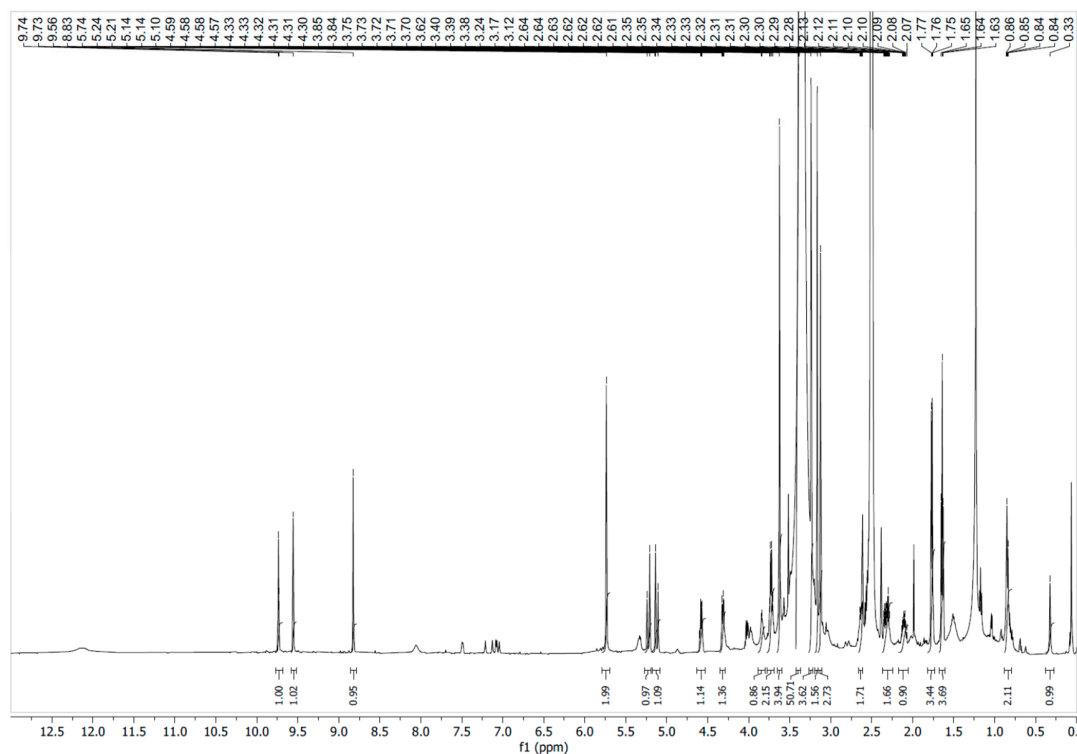

Supplementary Figure S1.  $^1\text{H}$  NMR spectrum of compound **1** in  $\text{DMSO}-d_6$  at 600 MHz.

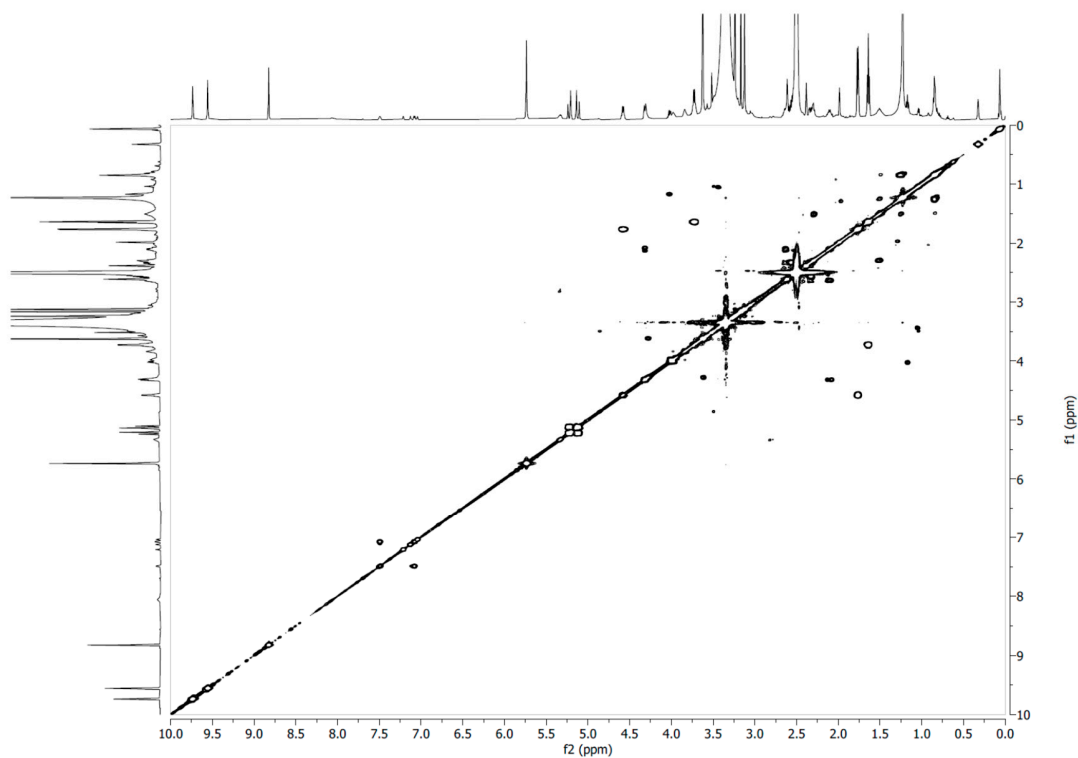

Supplementary Figure S2. COSY NMR spectrum of compound **1** in  $\text{DMSO}-d_6$ .

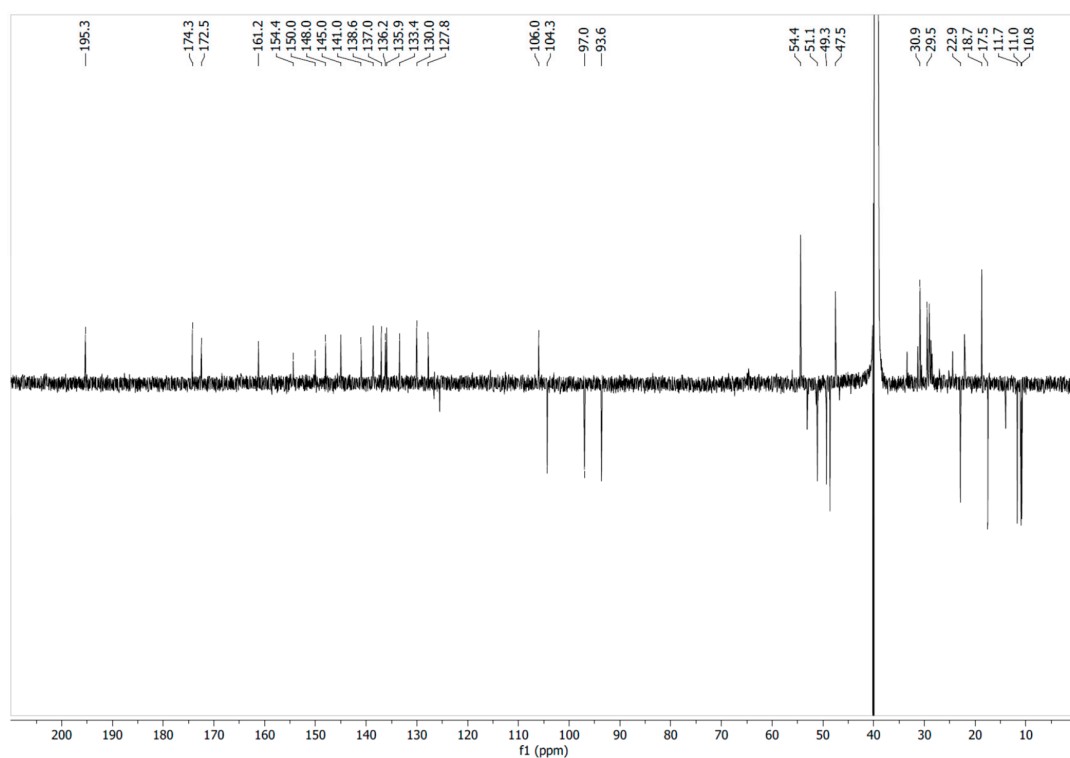

Supplementary Figure S3.  $^{13}\text{C}$ -DEPTQ NMR spectrum of compound **1** in  $\text{DMSO}-d_6$  at 151 MHz.

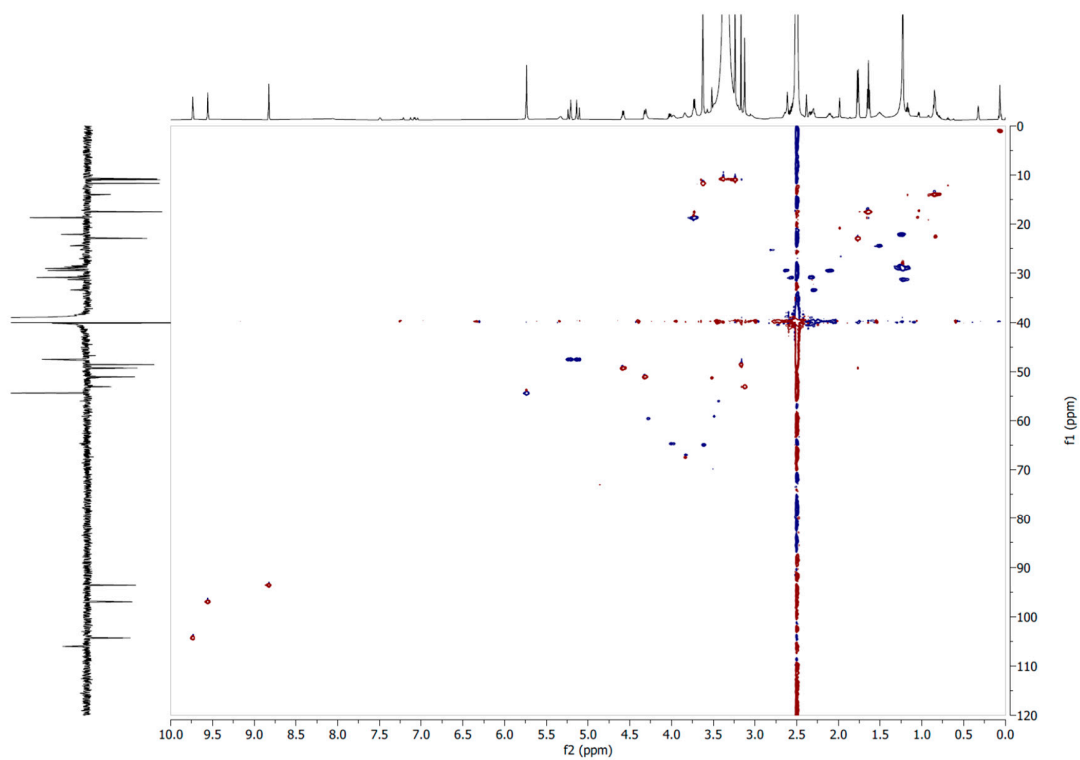

Supplementary Figure S4. Edited HSQC NMR spectrum of compound **1** in  $\text{DMSO}-d_6$ .

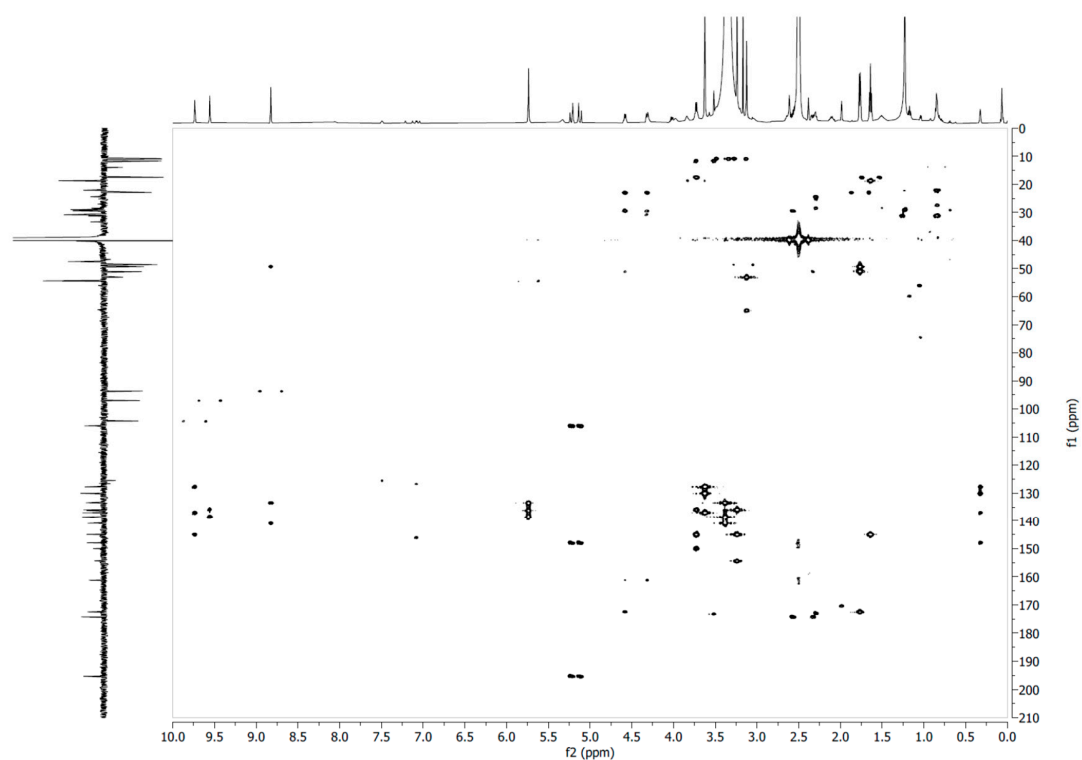

Supplementary Figure S5. HMBC NMR spectrum of compound **1** in DMSO- $d_6$ .

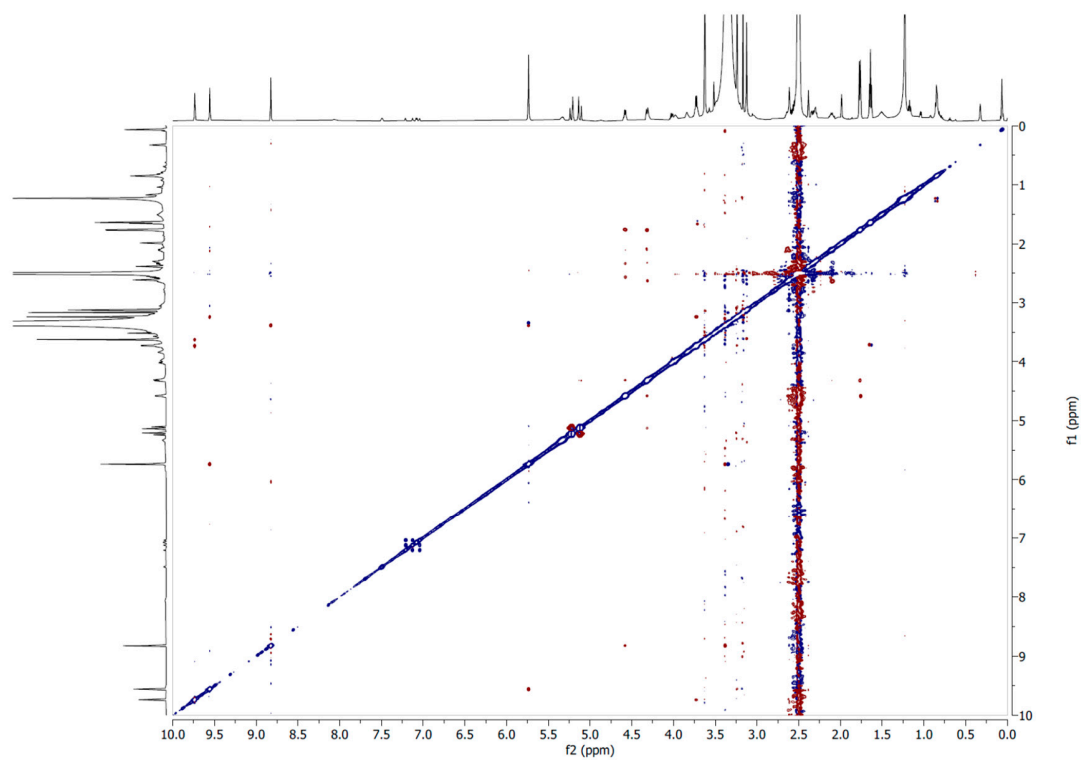

Supplementary Figure S6. ROESY NMR spectrum of compound **1** in DMSO- $d_6$ .

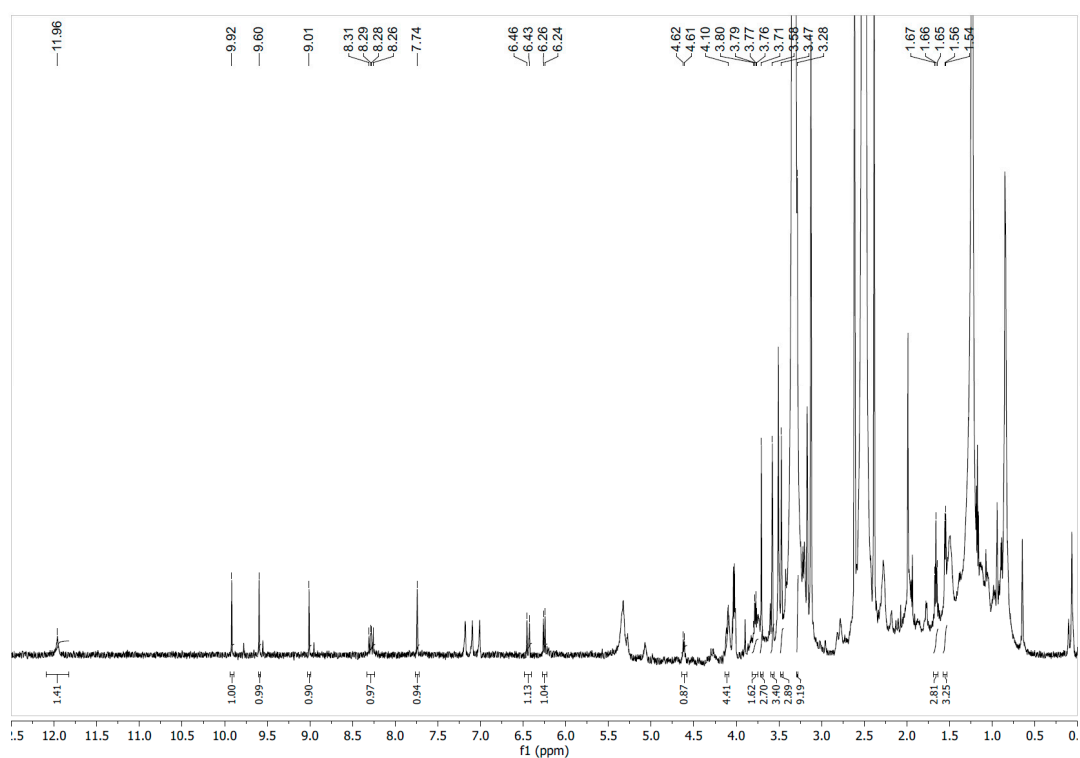

Supplementary Figure S7.  $^1\text{H}$  NMR spectrum of compound **2** in  $\text{DMSO}-d_6$  at 600 MHz.

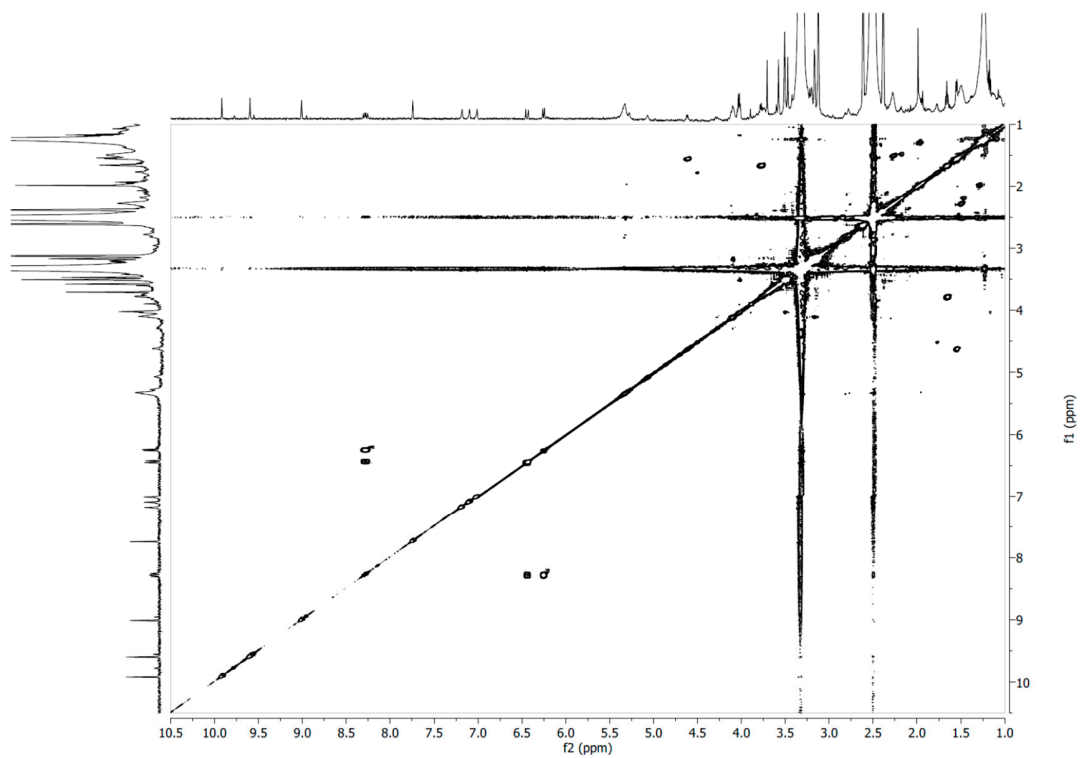

Supplementary Figure S8. COSY NMR spectrum of compound **2** in  $\text{DMSO}-d_6$ .

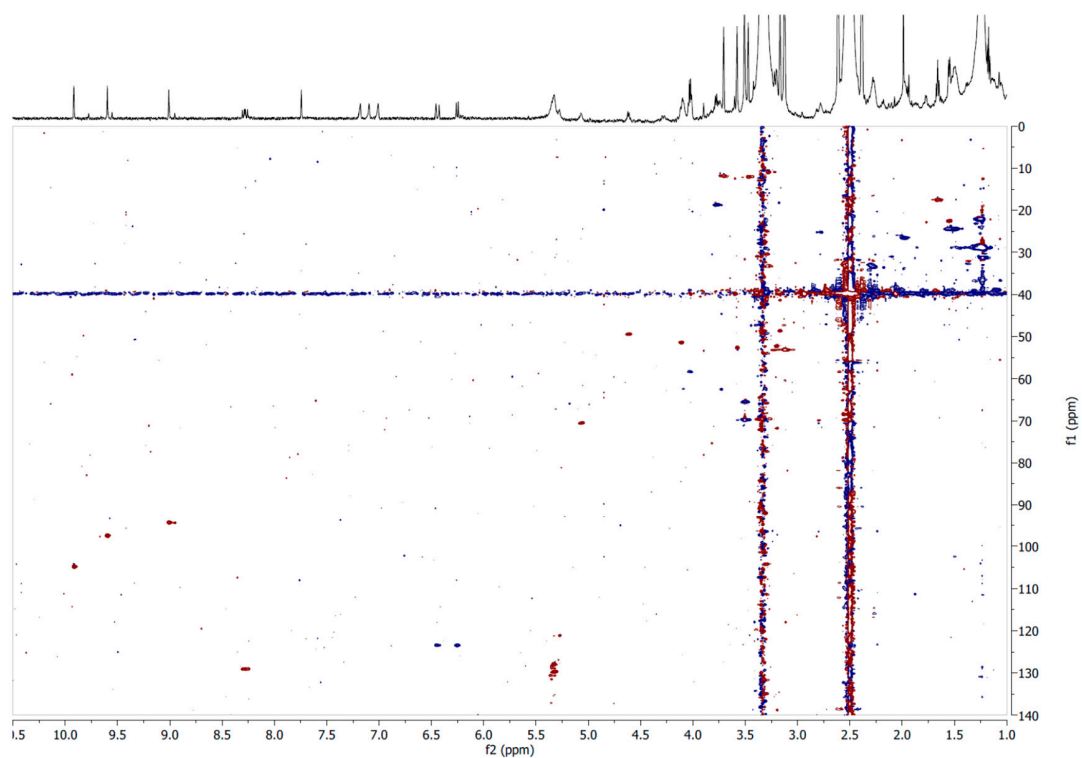

Supplementary Figure S9. Edited HSQC NMR spectrum of compound 2 in DMSO- $d_6$ .

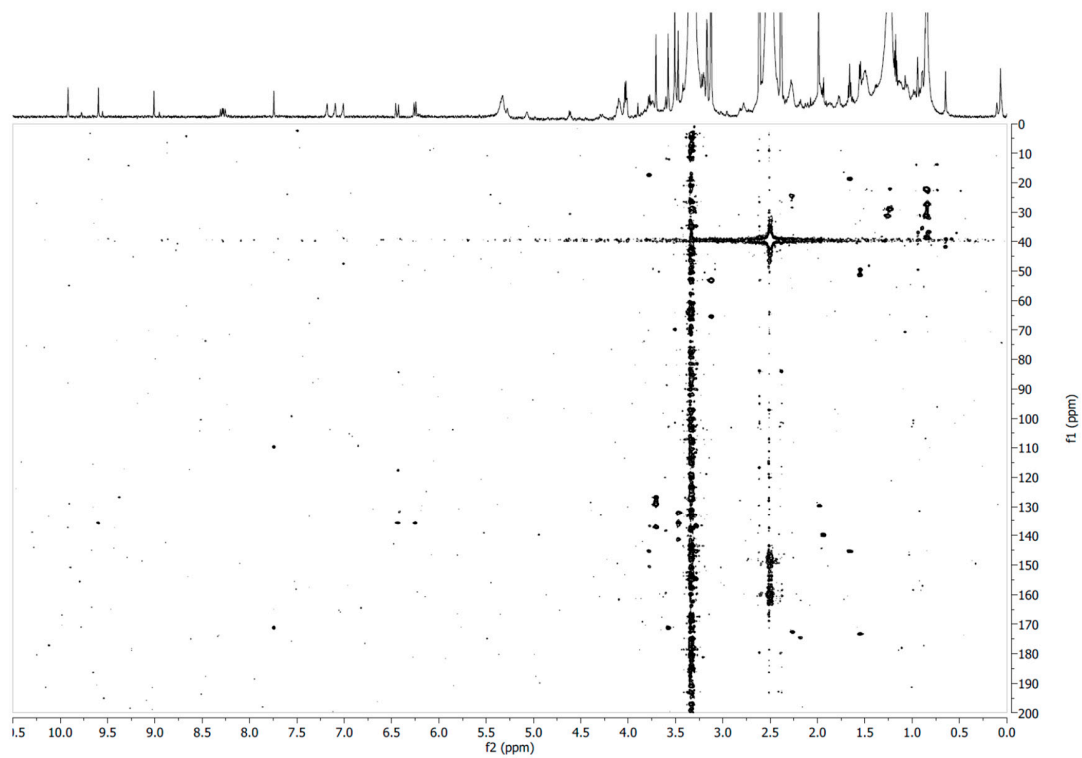

Supplementary Figure S10. HMBC NMR spectrum of compound 2 in DMSO- $d_6$ .

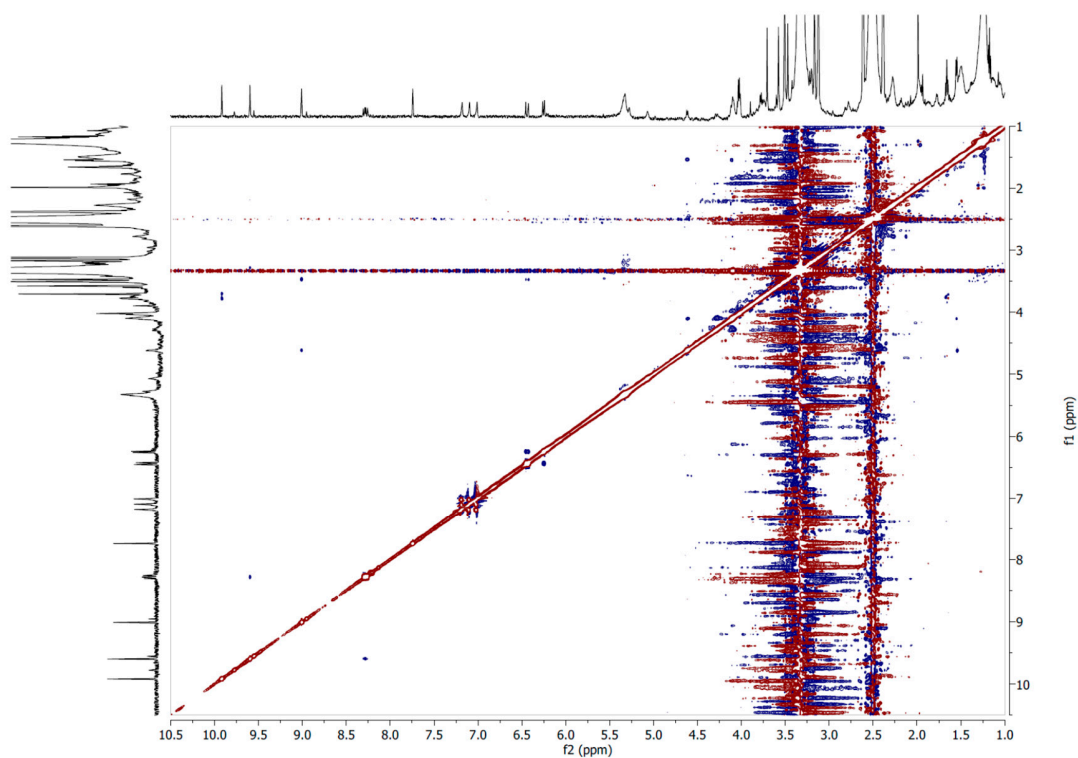

Supplementary Figure S11. ROESY NMR spectrum of compound **2** in DMSO- $d_6$ .

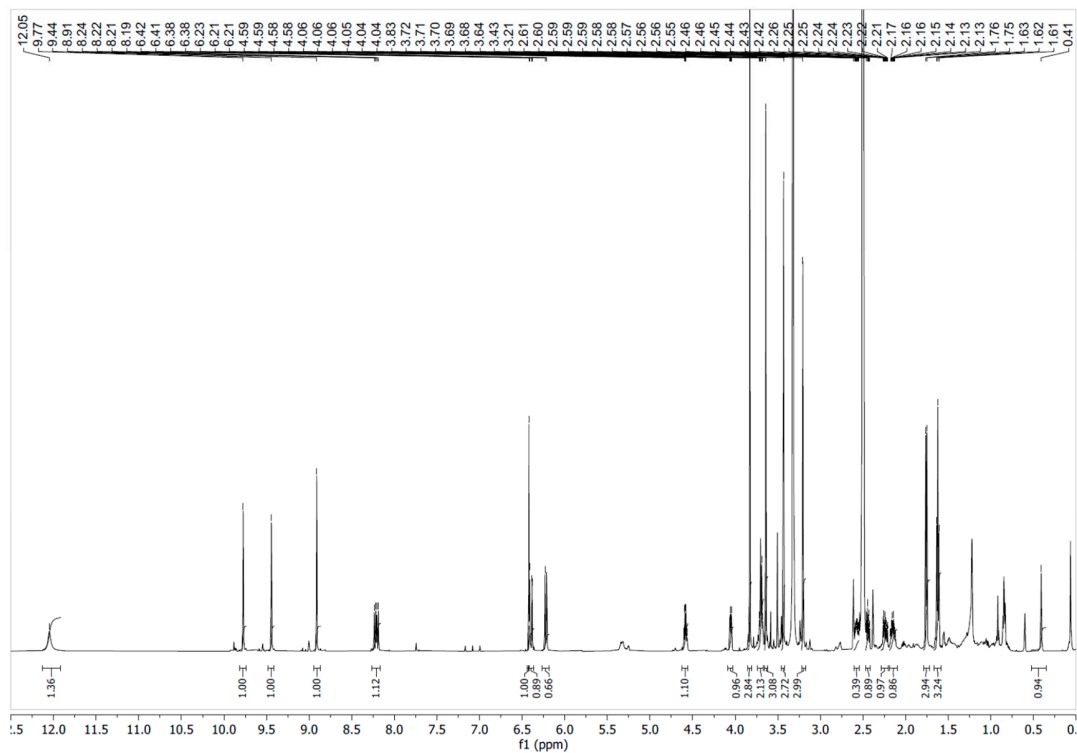

Supplementary Figure S12.  $^1\text{H}$  NMR spectrum of compound **3** in DMSO- $d_6$  at 600 MHz.

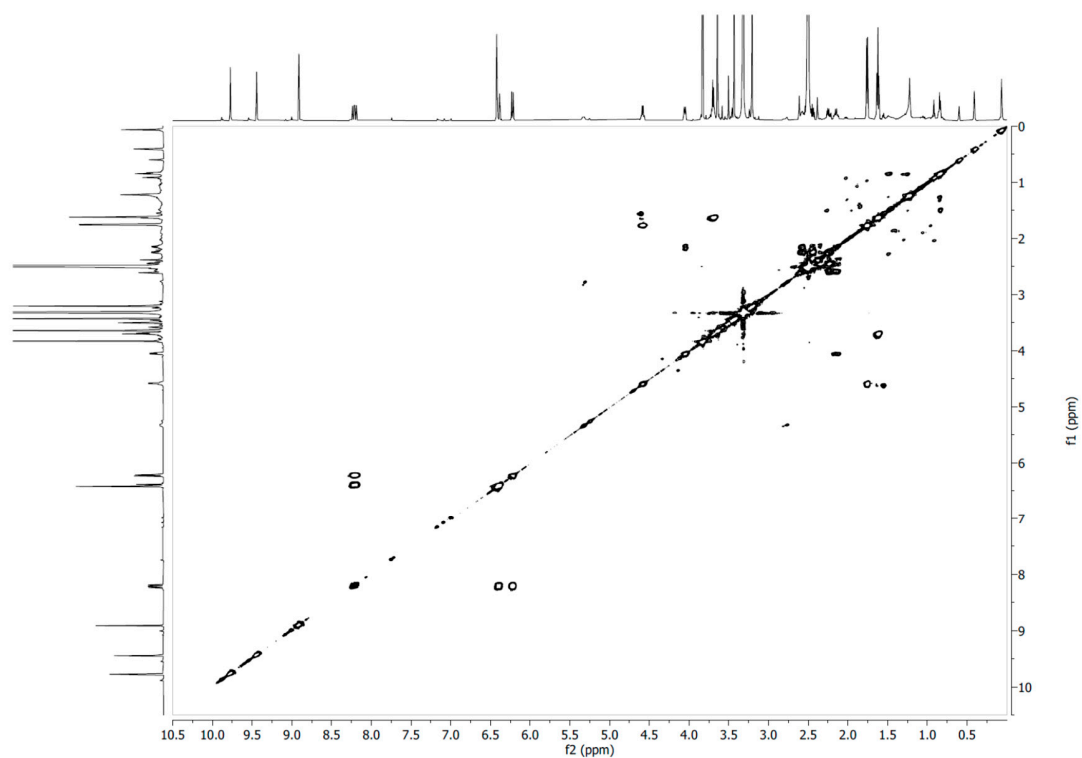

Supplementary Figure S13. COSY NMR spectrum of compound **3** in DMSO-*d*<sub>6</sub>.

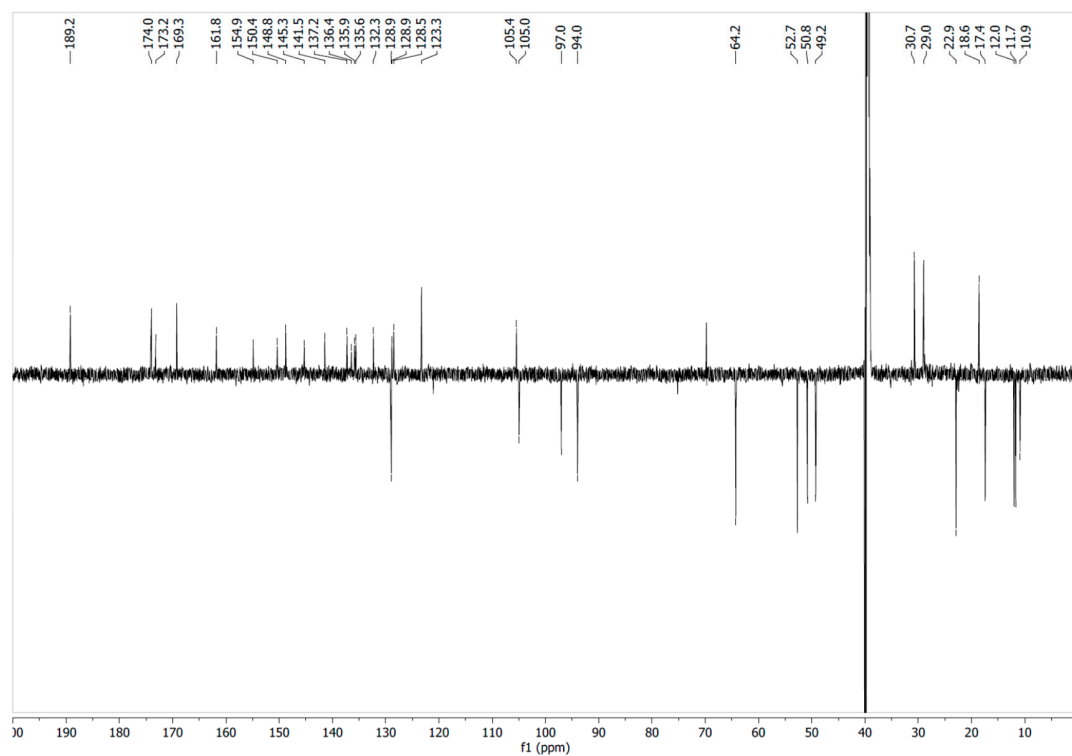

Supplementary Figure S14. <sup>13</sup>C-DEPTQ NMR spectrum of compound **3** in DMSO-*d*<sub>6</sub> at 151 MHz.

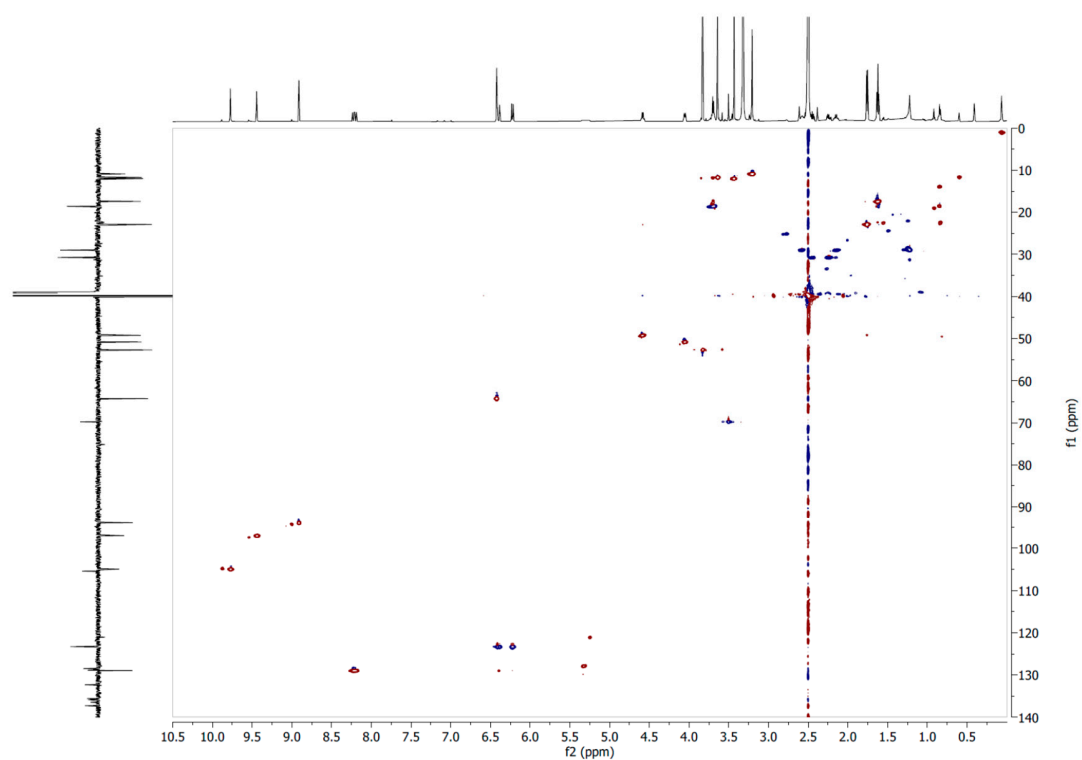

Supplementary Figure S15. Edited HSQC NMR spectrum of compound **3** in DMSO-*d*<sub>6</sub>.

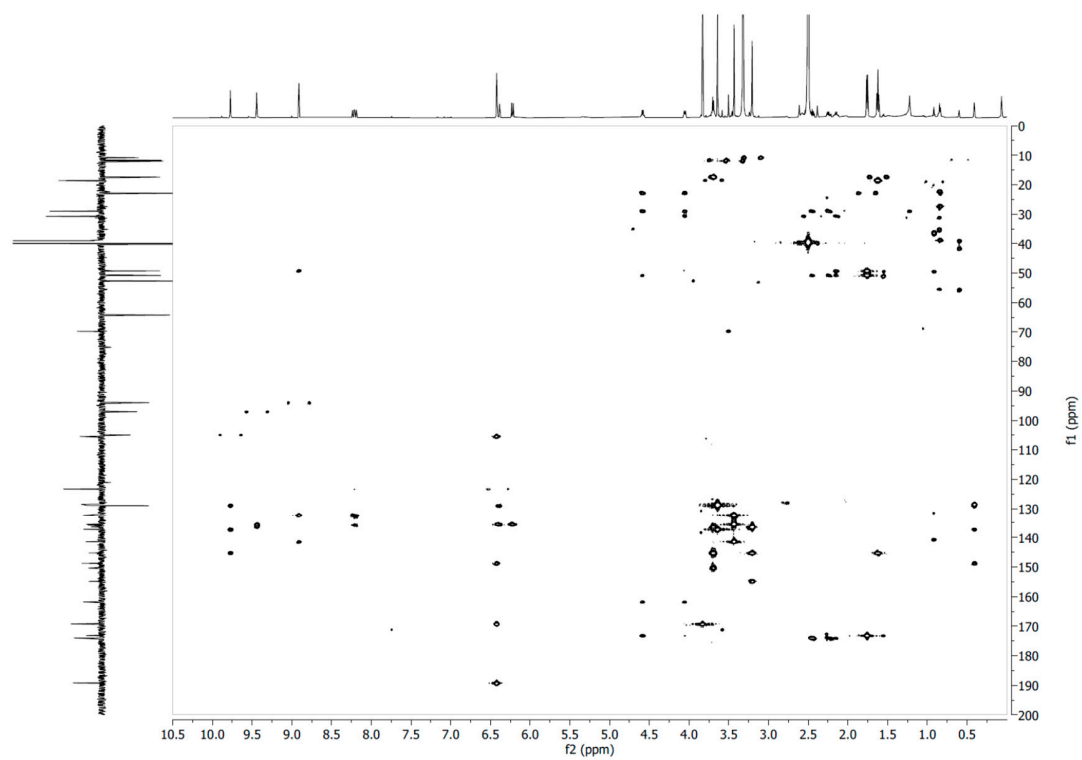

Supplementary Figure S16. HMBC NMR spectrum of compound **3** in DMSO-*d*<sub>6</sub>.



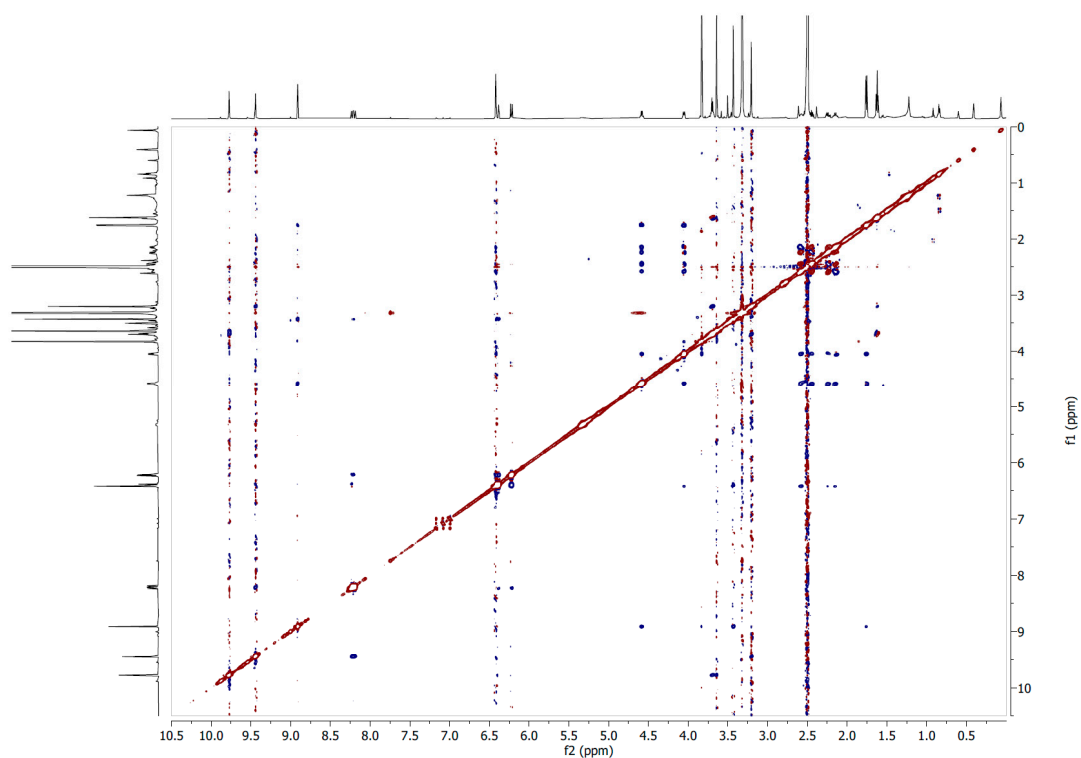

Supplementary Figure S17. ROESY NMR spectrum of compound **3** in DMSO- $d_6$ .

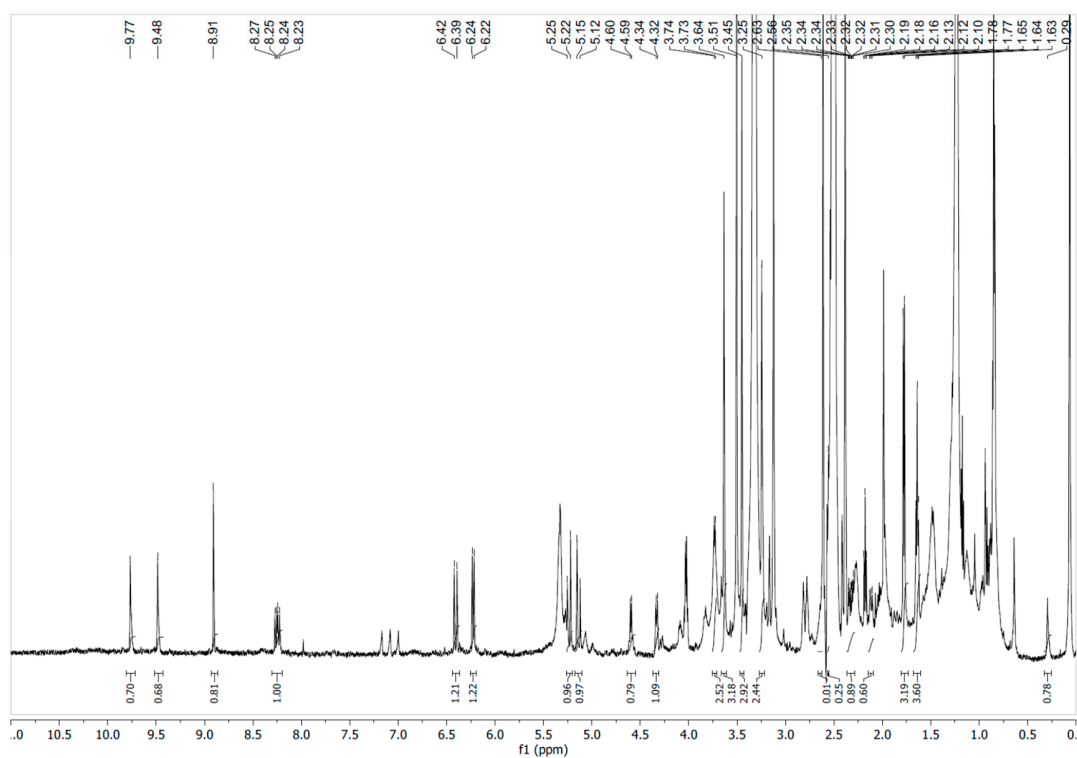

Supplementary Figure S18.  $^1\text{H}$  NMR spectrum of compound **4** in DMSO- $d_6$  at 600 MHz.

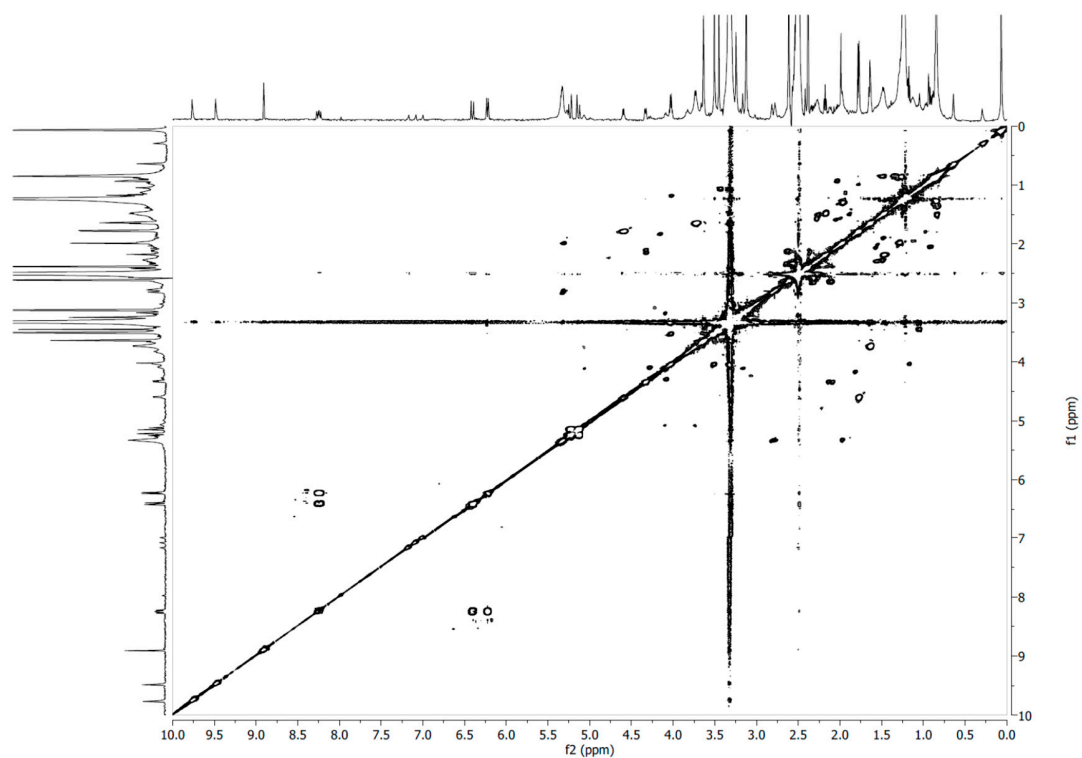

Supplementary Figure S19. COSY NMR spectrum of compound **4** in DMSO- $d_6$ .

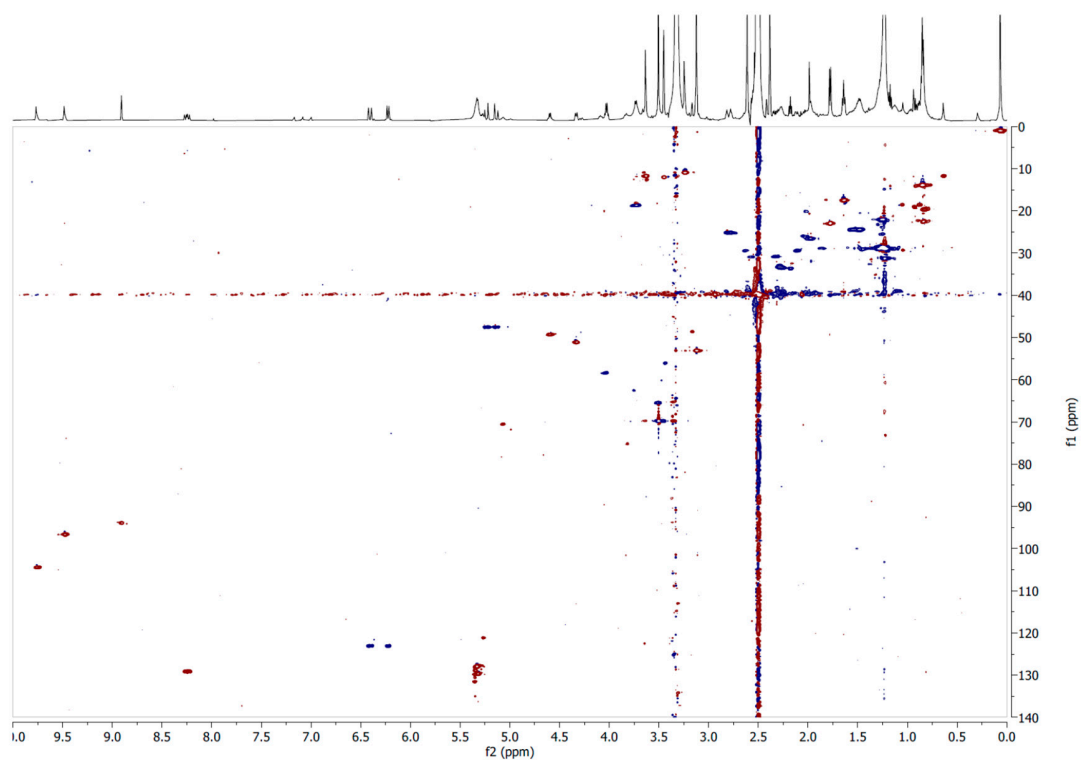

Supplementary Figure S20. Edited HSQC NMR spectrum of compound **4** in DMSO- $d_6$ .

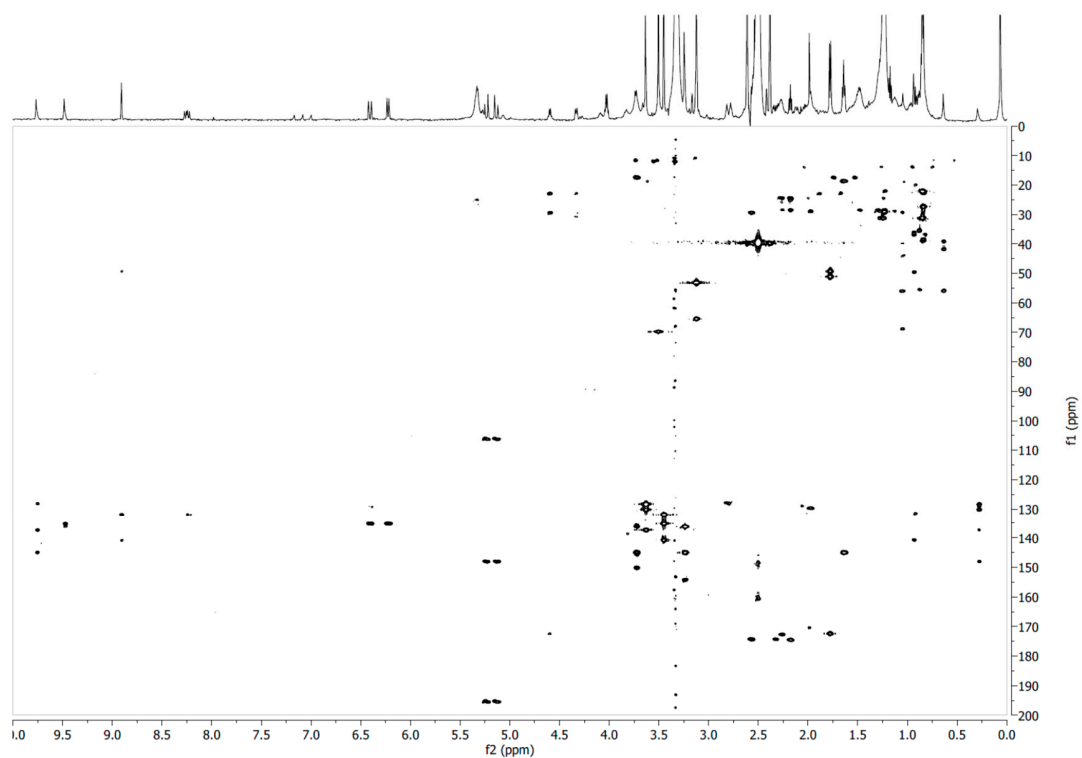

Supplementary Figure S21. HMBC NMR spectrum of compound **4** in DMSO- $d_6$ .

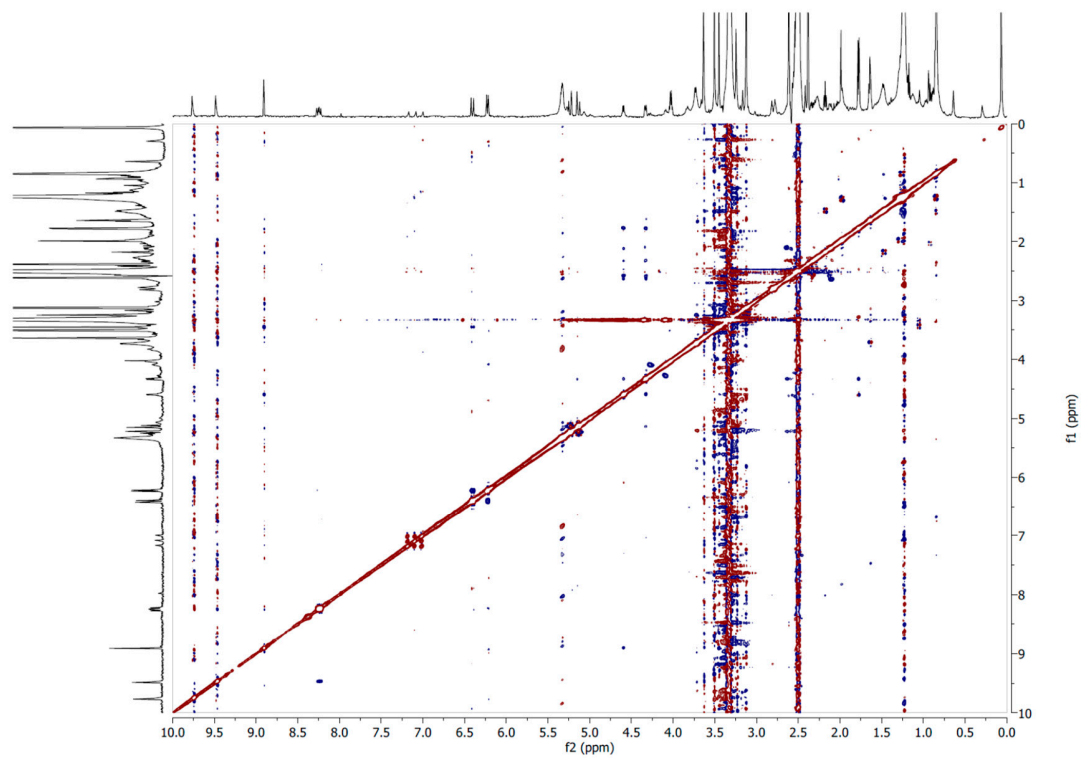

Supplementary Figure S22. ROESY NMR spectrum of compound **4** in DMSO- $d_6$ .

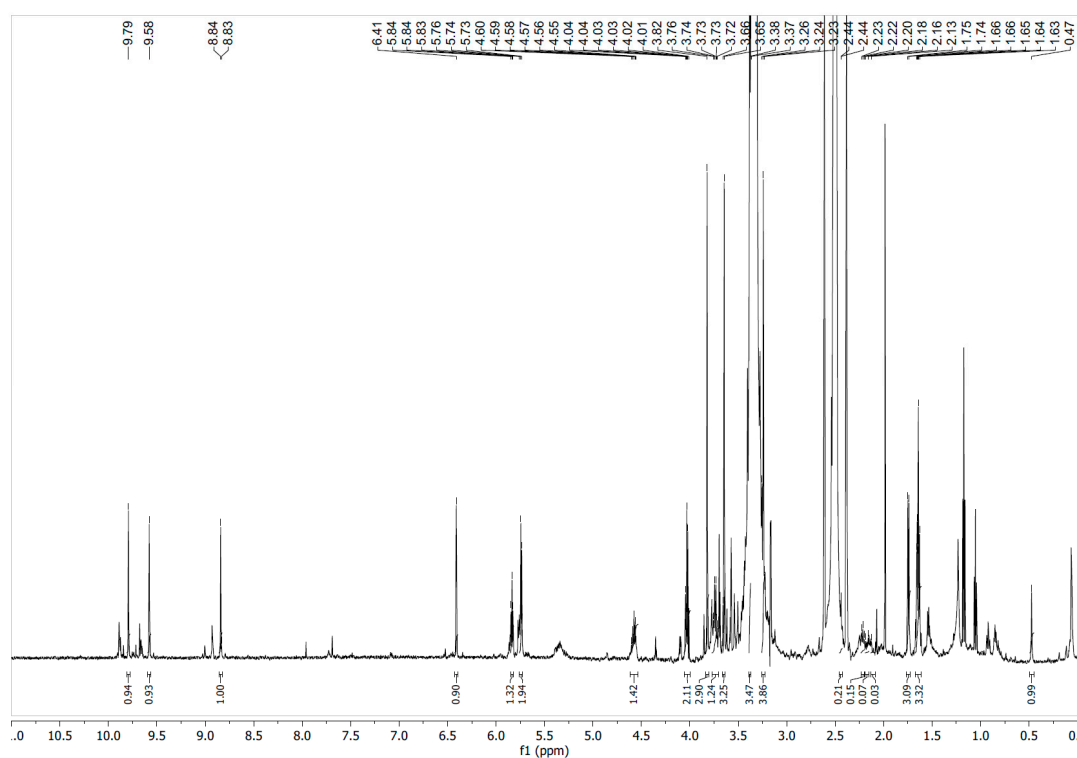

Supplementary Figure S23. <sup>1</sup>H NMR spectrum of compound **5** in DMSO-*d*<sub>6</sub> at 600 MHz.

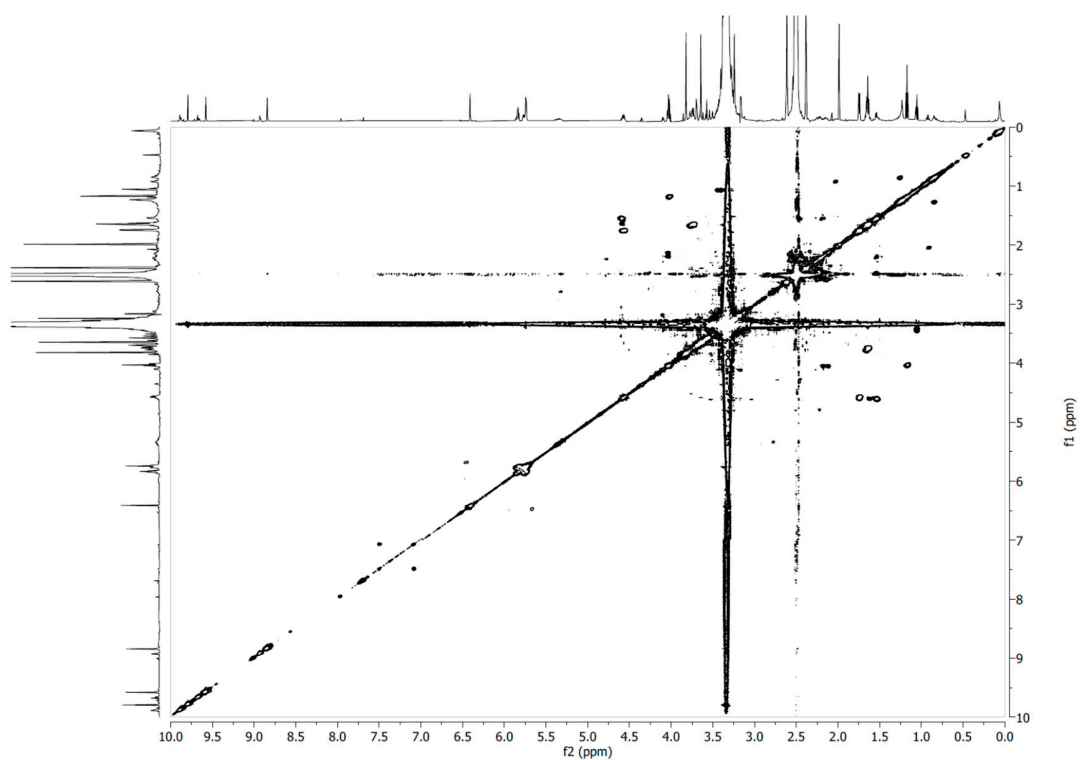

Supplementary Figure S24. COSY NMR spectrum of compound **5** in DMSO-*d*<sub>6</sub>.

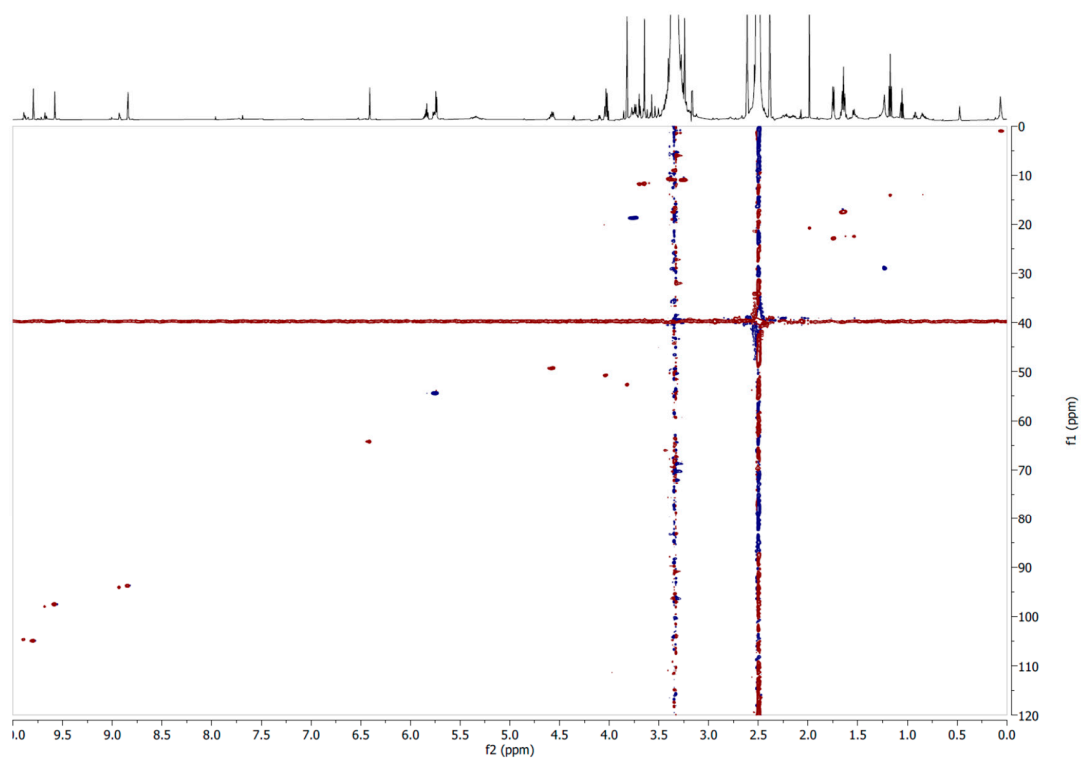

Supplementary Figure S25. Edited HSQC NMR spectrum of compound **5** in DMSO- $d_6$ .

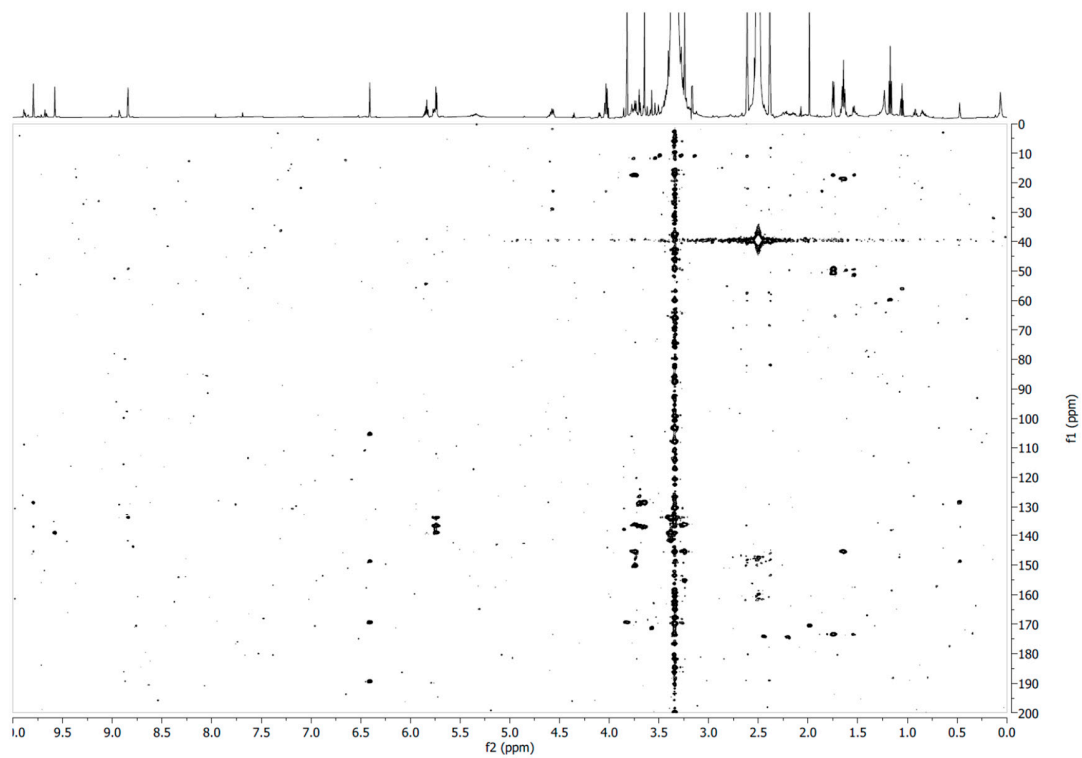

Supplementary Figure S26. HMBC NMR spectrum of compound **5** in DMSO- $d_6$ .

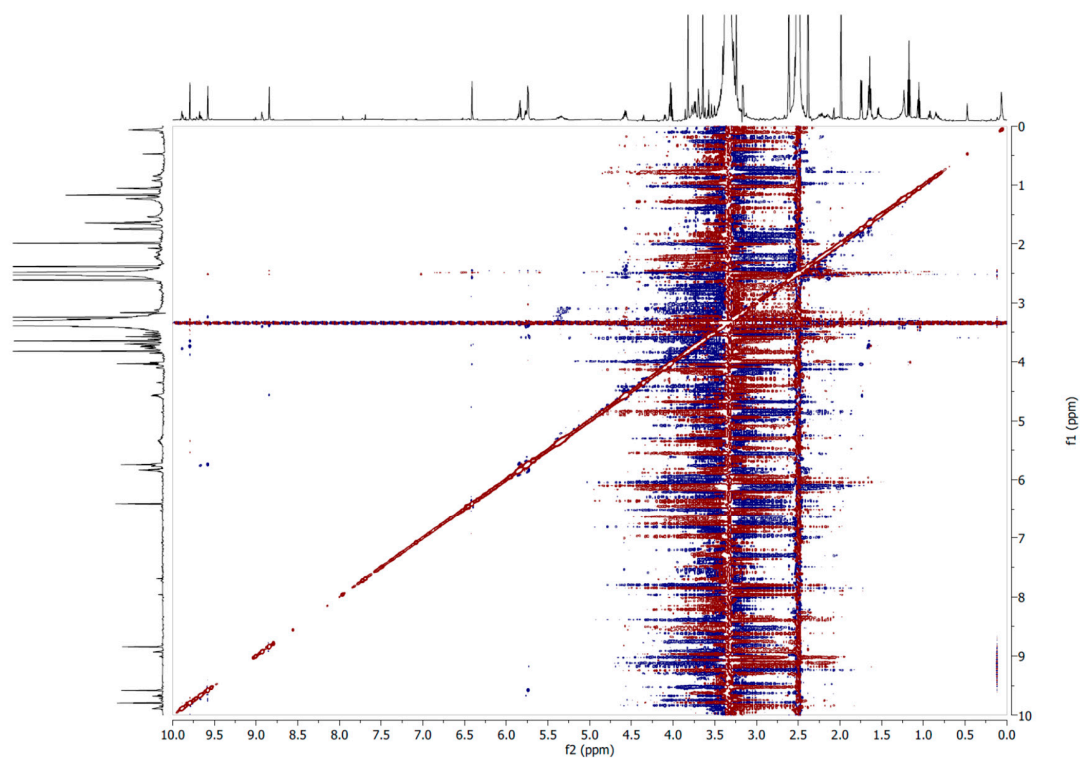

Supplementary Figure S27. ROESY NMR spectrum of compound **5** in DMSO-*d*<sub>6</sub>.

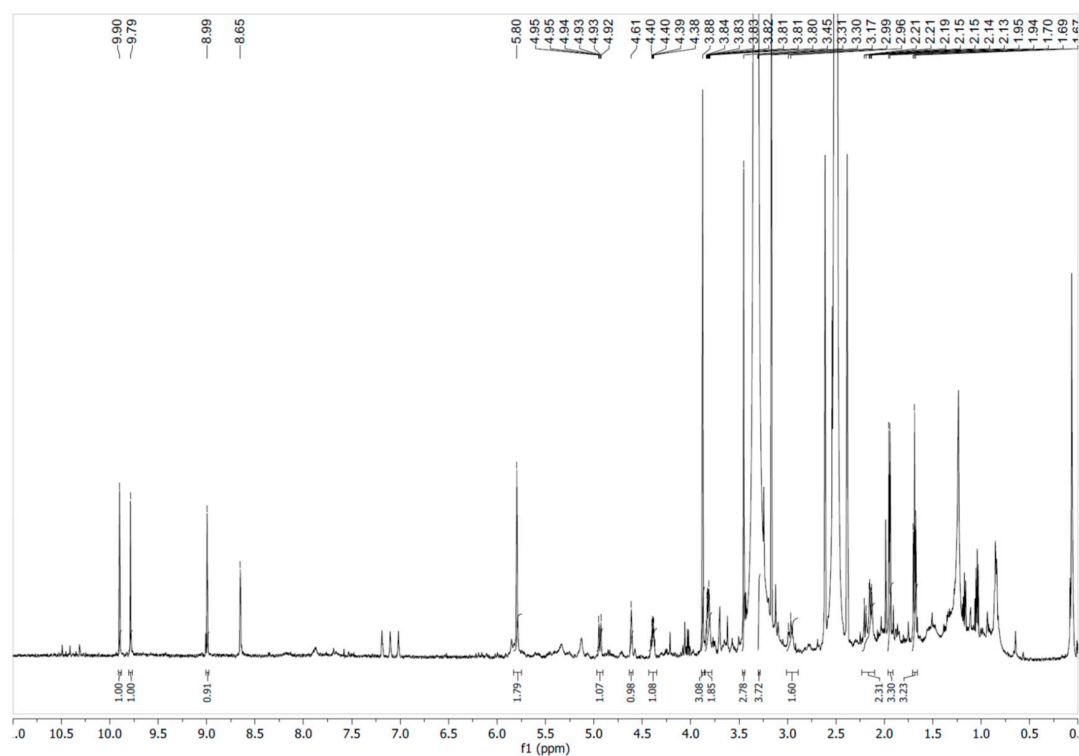

Supplementary Figure S28. <sup>1</sup>H NMR spectrum of compound **6** in DMSO-*d*<sub>6</sub> at 600 MHz.

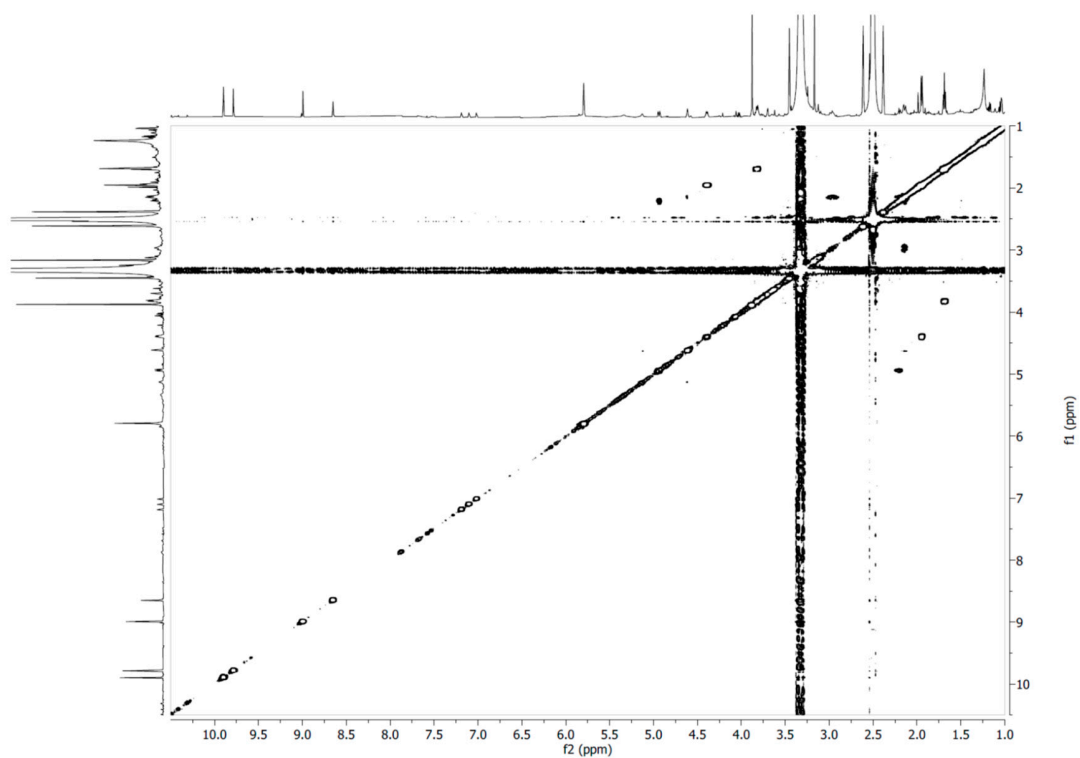

Supplementary Figure S29. COSY NMR spectrum of compound **6** in DMSO- $d_6$ .

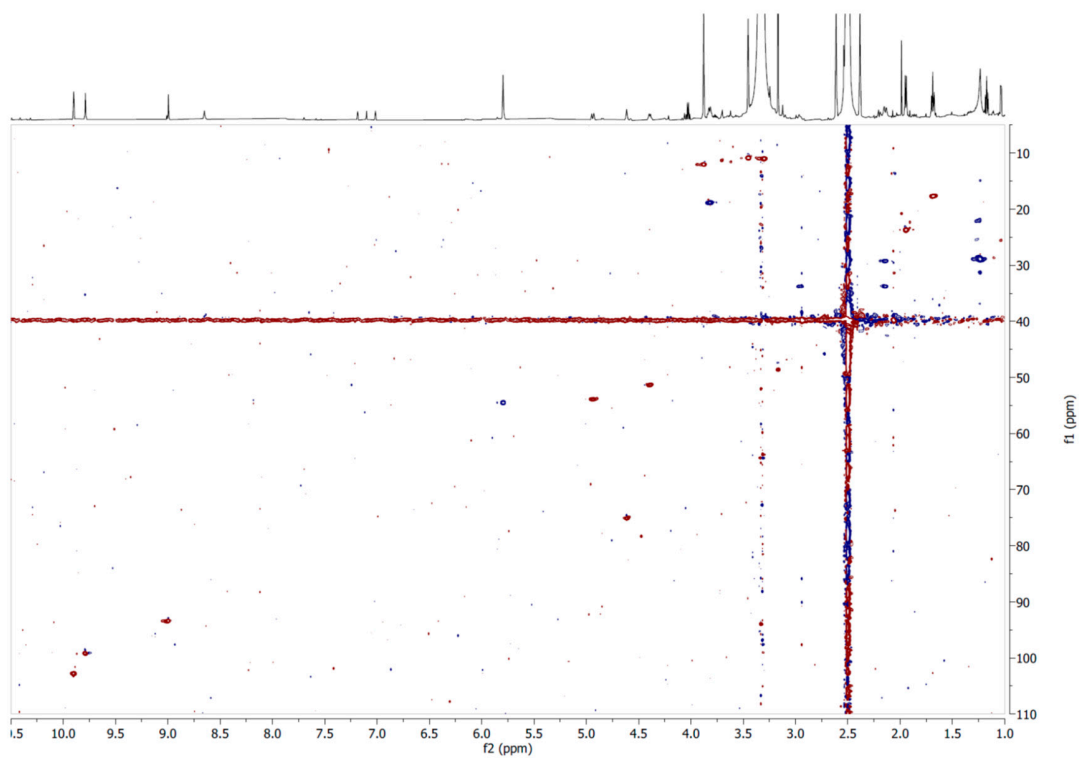

Supplementary Figure S30. Edited HSQC NMR spectrum of compound **6** in DMSO- $d_6$ .

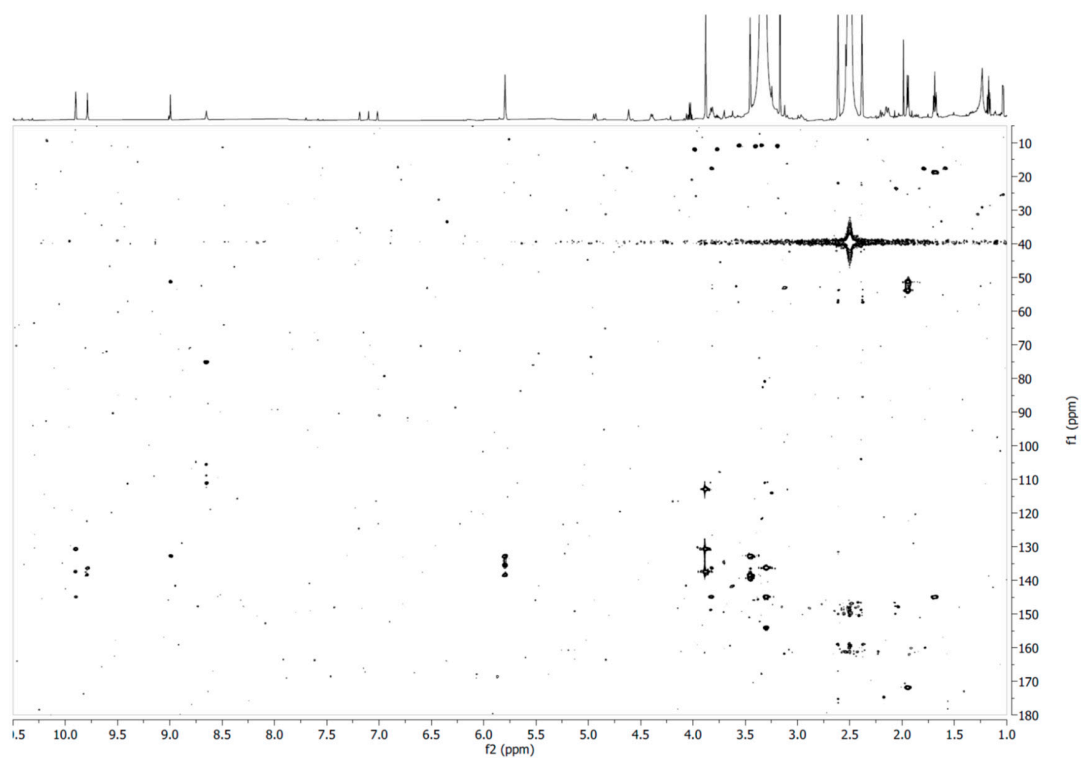

Supplementary Figure S31. HMBC NMR spectrum of compound **6** in DMSO- $d_6$ .

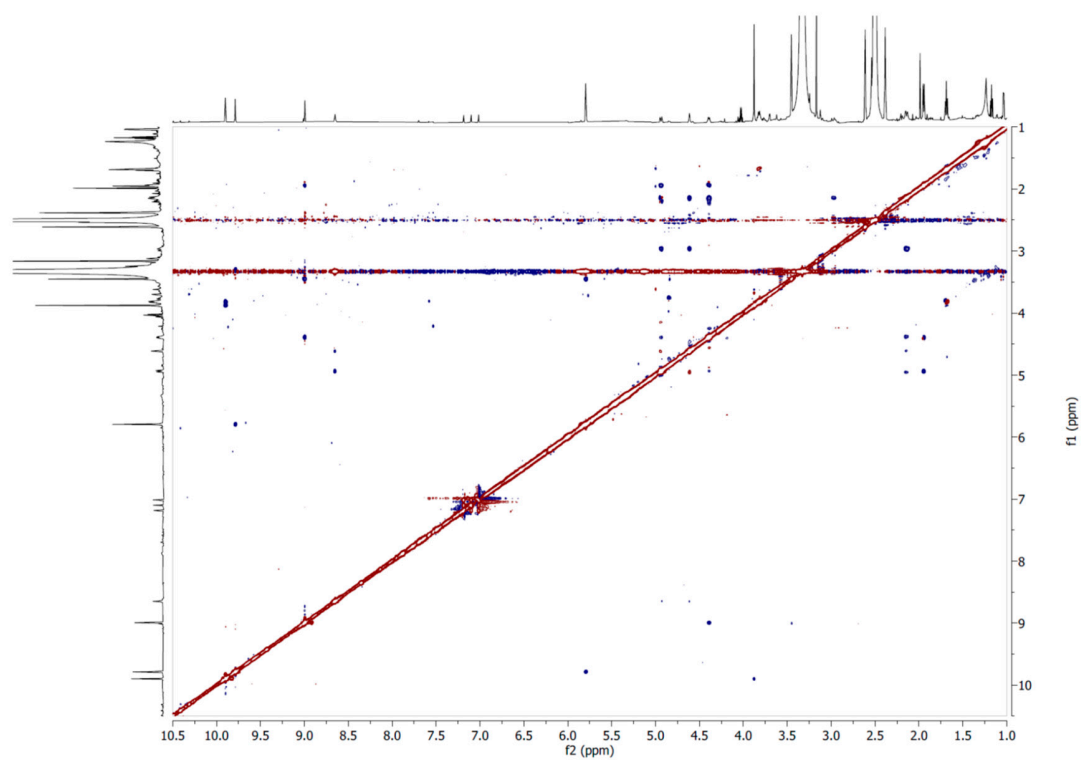

Supplementary Figure S32. ROESY NMR spectrum of compound **6** in DMSO- $d_6$ .



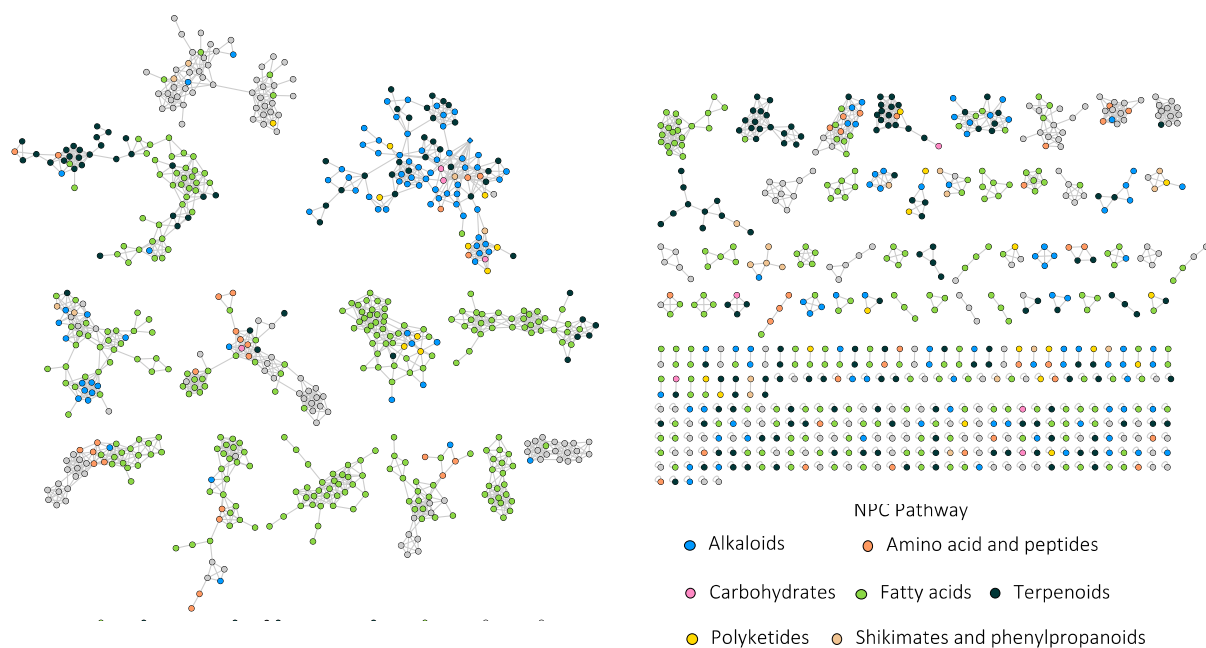

Supplementary Figure S33. Feature-based Molecular Network of the EtOAc and MeOH (butanolic fraction) extracts of *Ophiura sarsii*. Nodes are colored according to their predicted natural product pathway (NPClassifier).

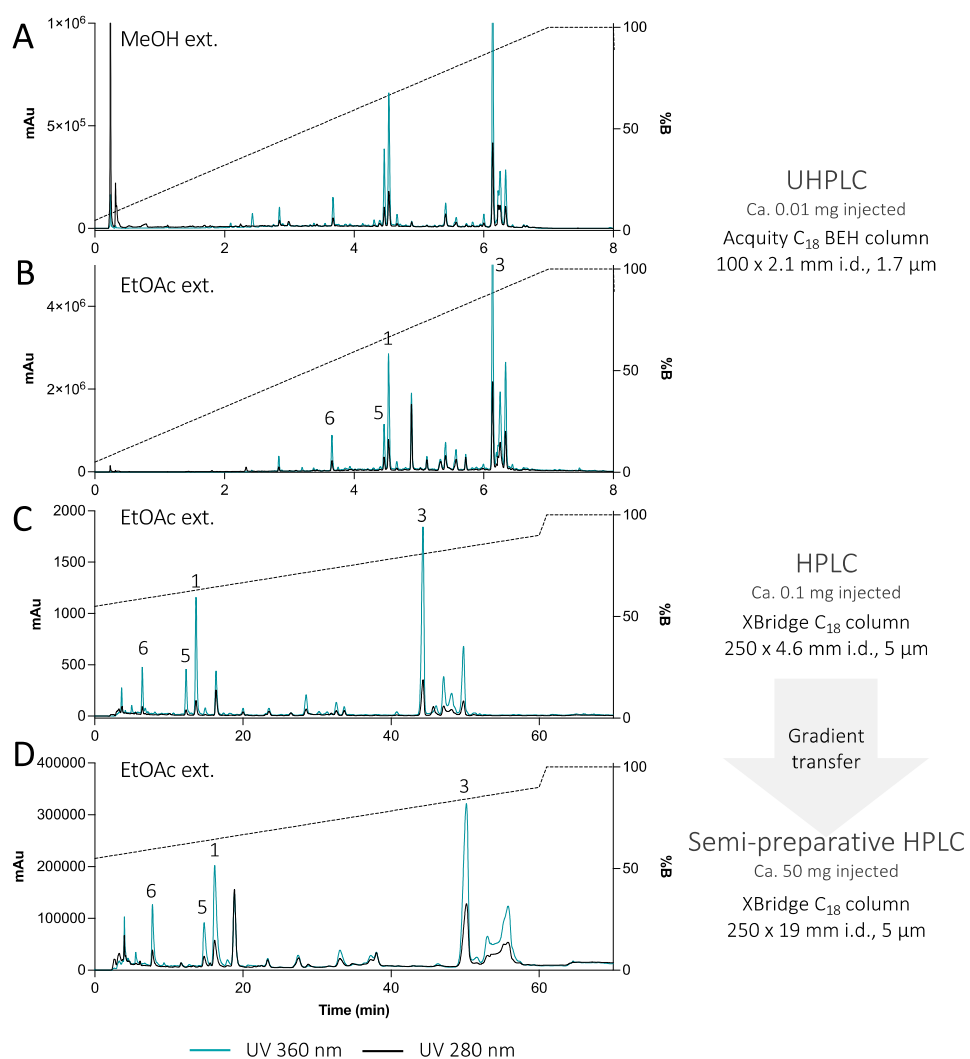

Supplementary Figure S34. (A, B) UHPLC-PDA-ELSD analysis of the raw MeOH and EtOAc extract of *Ophiura sarsii*. (C) Optimized HPLC-PDA-ELSD analysis of the EtOAc extract of *O. sarsii*. (D) semi-preparative HPLC-UV analysis after gradient transfer using a dry load injection.

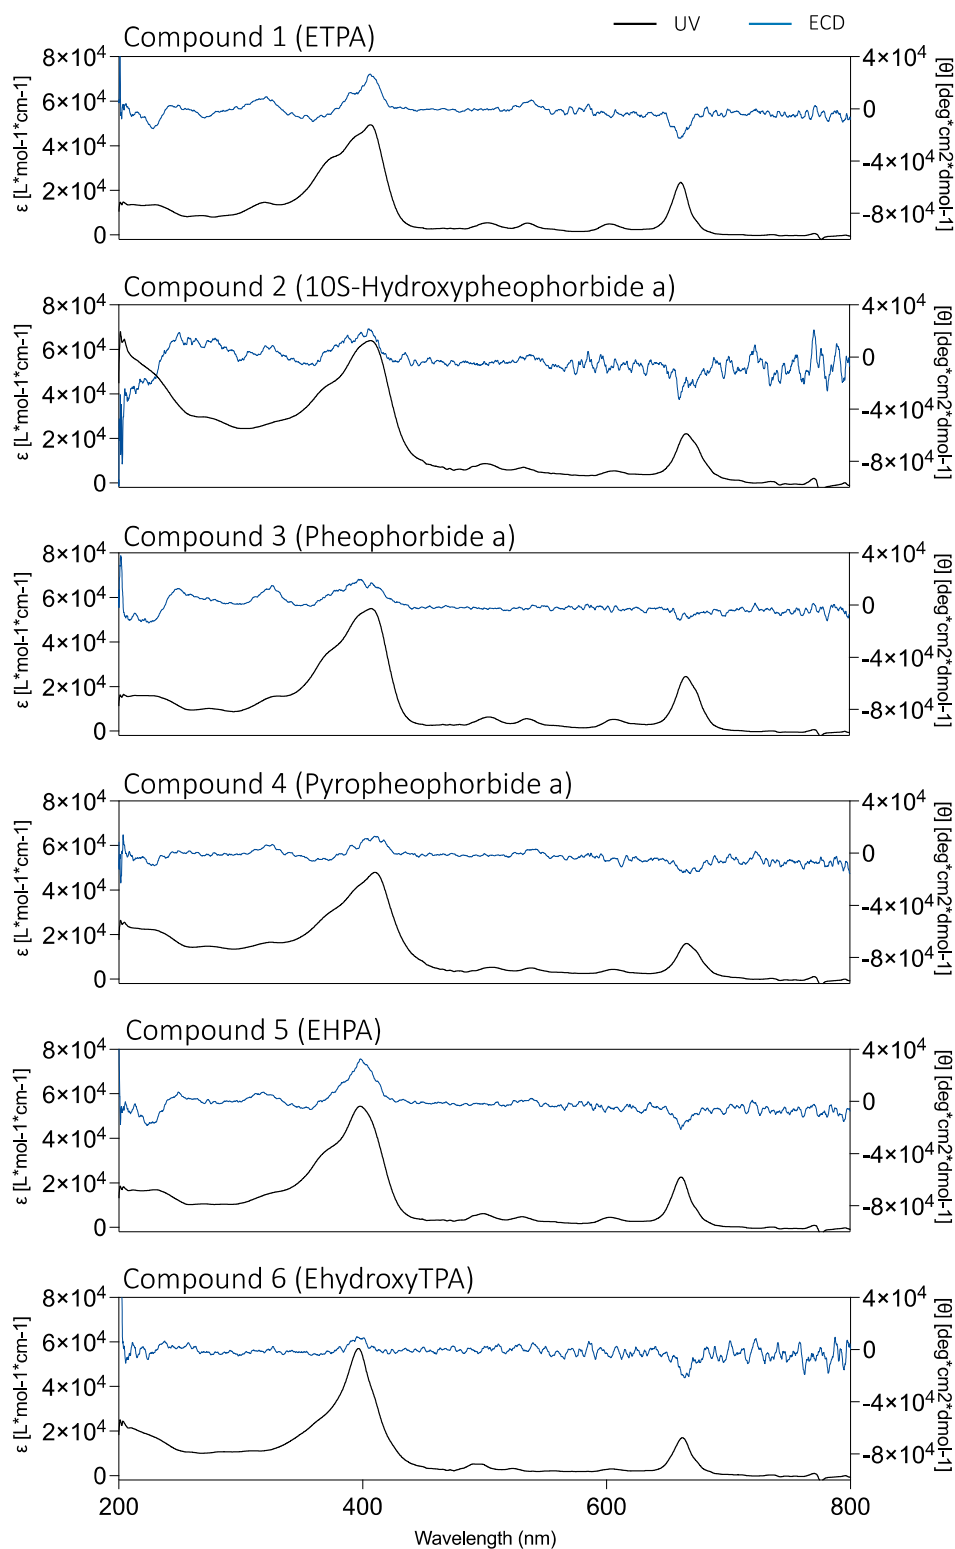

Supplementary Figure S35. UV-Vis and ECD spectra of the isolated compounds.

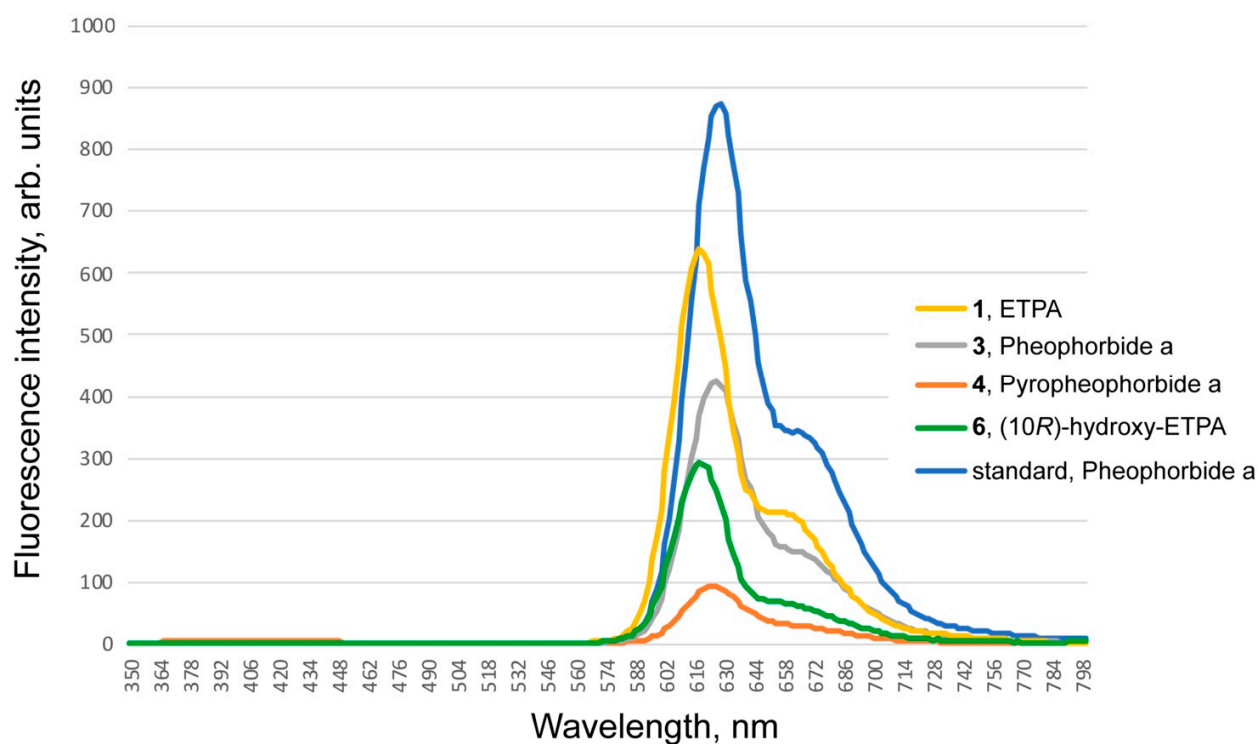

Supplementary Figure S36. Fluorescence spectra of compounds **1** (ETPA), **3** (Pheophorbide a), **4** (Pyropheophorbide a), and **6** ((10*R*)-hydroxy-ETPA), along with that of commercial standard (Pheophorbide a) after excitation at 350 nm.

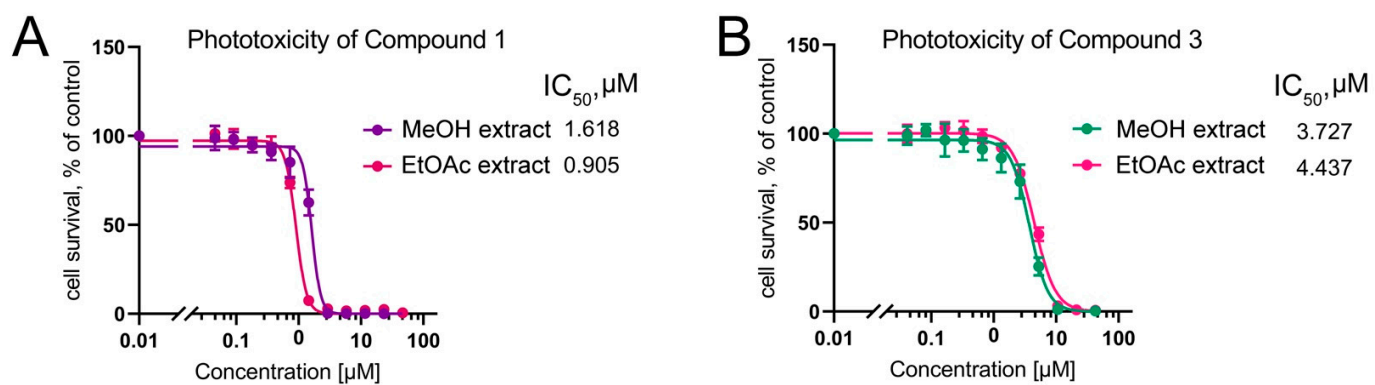

Supplementary Figure S37. Phototoxicity of compounds **1** (ETPA, A) and **3** (Pheophorbide a, B) isolated from MeOH and EtOAc extracts.
